# Supplementary material
Source: Research Square preprint supplement (doi:10.21203/rs.3.rs-8083305/v1)
Supplement: Supplementary file 1 [file 7283f85de2e6a93e36af9ce1.docx]

**WHO recommended research protocol**

**Title**

Effect-site concentration of remifentanil inhibiting hemodynamic response following endotracheal intubation during remimazolam induction

**Investigators and Contact Information**

Principal Investigator: Dr. Jiyoung Lee
Department of Anesthesiology and Pain Medicine, CHA Bundang Medical Center, CHA University

59 Yatap-ro, Bundang-gu, Seongnam-si, Gyeonggi-do, Republic of Korea
Tel: +82-31-780-5431
Email: [**jlee0616@cha.ac.kr**](mailto:jlee0616@cha.ac.kr)

**Background and Rationale**

Endotracheal intubation frequently causes abrupt increases in blood pressure and heart rate leading to arrhythmias and myocardial ischemia. Various agents, including opioids, are used to mitigate these responses. Remifentanil, a potent μ-receptor opioid with rapid onset and short duration, is commonly used for this purpose. Recently, videolaryngoscopy has improved glottic visualization and reduced trauma compared to direct laryngoscopy and is recommended especially during the COVID-19 pandemic. Remimazolam, an ultra-short-acting benzodiazepine, has advantages of rapid onset, short elimination half-life independent of liver and kidney function, less respiratory and cardiovascular depression than propofol, minimal vascular pain, and reversibility with flumazenil. However, the effect-site concentration of remifentanil during remimazolam induction for endotracheal intubation has not been established.

**Objectives**

To determine the remifentanil effect-site concentration that provides hemodynamic stability (blood pressure and heart rate increase <20% from baseline at 1 minute after intubation) in 95% (EC95) of adult patients undergoing endotracheal intubation using videolaryngoscopy during induction with remimazolam.

**Study Sites and Sponsors**

Department of Anesthesiology and Pain Medicine, CHA Bundang Medical Center, CHA University
No external sponsors.

**Study Period**

From IRB approval to December 31, 2024.

**Study Population**

Adult patients aged 19-65 years scheduled for general anesthesia classified as ASA physical status 1 or 2.

**Inclusion Criteria**

- ASA physical status 1 or 2
- Scheduled for general anesthesia with endotracheal intubation

**Exclusion Criteria**

- Allergies to study drugs
- Acute narrow-angle glaucoma
- Obstructive sleep apnea syndrome
- Alcohol or drug dependence
- Galactose or lactase deficiency
- Hypersensitivity to dextran 40
- Significant cardiac, pulmonary, renal, hepatic, neurological, or psychiatric disorders
- Pregnancy or breastfeeding
- Foreign nationals
- ASA physical status 3 or higher

**Sample Size**

34 patients based on the requirement of at least 6 crossovers in Dixon's design and prior similar studies.

**Study Design and Methods**

This prospective study enrolls eligible patients after informed consent. Standard monitoring is applied (pulse oximetry, ECG, noninvasive blood pressure, bispectral index). Following 1-minute preoxygenation with 100% oxygen, remimazolam is infused at 6 mg/kg/h until loss of consciousness (no response to verbal commands, loss of eyelash reflex), then reduced to 1-2 mg/kg/h as maintenance. Simultaneously, remifentanil is administered using target-controlled infusion according to the Minto pharmacokinetic model, starting at an initial effect-site concentration of 4.0 ng/ml. Rocuronium 0.6 mg/kg is given, and after 2 minutes, videolaryngoscopy is performed for intubation. Hemodynamic parameters are assessed 1 minute after intubation. If blood pressure or heart rate increases by 20% or more, remifentanil concentration is increased by 0.5 ng/ml for the next patient: if not, decreased by 0.5 ng/ml.

Safety interventions such as ephedrine for hypotension (mean arterial pressure <50 mmHg) and atropine for bradycardia (heart rate <45) are standardized.

**Outcome Measures**

- Primary: Remifentanil EC95 for hemodynamic stability at 1 minute post-intubation
- Secondary: Remifentanil EC50 for same criteria

**Data Collection**

Demographics, ASA status, diagnosis, surgery type, comorbidities, vital signs (blood pressure, heart rate, oxygen saturation, temperature, BIS) at baseline, pre-intubation, 1 minute, and 5 minute post-intubation, and remifentanil concentration.

**Statistical Analysis**

SPSS 26 and R 3.2.2 will be used. Categorical data analyzed by chi-square or Fisher’s exact test. Continuous data by t-test or ANOVA. EC95 and EC50 calculated by isotonic regression with bootstrapping (PAVA method). Significance at p<0.05.

**Safety and Adverse Events**

Standard anesthetic monitoring and drug administration procedures are followed. Potential adverse effects related to study drugs (remimazolam, remifentanil, rocuronium) will be managed per institutional protocols. Patients have access to contact study staff for reporting adverse events.

**Ethical Considerations**

Informed written consent obtained. Patient confidentiality is protected. Study conducted pursuant to Declaration of Helsinki principles and approved by institutional ethics committee.

**Data protection**

Personal health information will be coded and stored securely. Only the research team and authorized monitors will have access. Records will be retained for 3 years and then destroyed.

**Expected Benefits**

Determination of remifentanil EC95 during remimazolam induction will optimize hemodynamic control, enhancing patient safety and anesthesia quality.

**Timeline**

Study duration from ethics approval to completion December 2024 with monthly milestones.

**Potential Challenges**

Anticipated issues include patient recruitment and protocol adherence; solutions include clear inclusion criteria and investigator training.
